# Supplementary material for: Response of Soil Nitrogen Components and nirK- and nirS-Type Denitrifying Bacterial Community Structures to Drip Irrigation Systems in the Semi-Arid Area of Northeast China
Source: MDPI journal article supplement (doi:10.3390/agronomy14030577), 2024-03-14
Supplement: s1 [file s1]

**Table S1.** The contribution rate in RDA of soil NR and soil nutrients under three irrigation systems.

| <b>Name</b>                     | <b>Contribution %</b> | <b>pseudo-F</b> | <b><i>P</i></b> |
|---------------------------------|-----------------------|-----------------|-----------------|
| Moisture                        | 82.8                  | 33.5            | 0.008           |
| AVN                             | 7.6                   | 4.7             | 0.05            |
| NO <sub>3</sub> <sup>-</sup> -N | 4.5                   | 4.3             | 0.102           |
| NH <sub>4</sub> <sup>+</sup> -N | 2.2                   | 2.9             | 0.194           |
| pH                              | 2.2                   | 8.0             | 0.044           |
| TN                              | 0.6                   | 4.4             | 0.154           |

TN, total nitrogen; AVN, available nitrogen; NH<sub>4</sub><sup>+</sup>-N, ammonium nitrogen; NO<sub>3</sub><sup>-</sup>-N, nitrate nitrogen.

**Table S2.** The contribution rate in RDA of soil NiR and soil nutrients under three irrigation systems.

| <b>Name</b>                     | <b>Contribution %</b> | <b>pseudo-F</b> | <b><i>P</i></b> |
|---------------------------------|-----------------------|-----------------|-----------------|
| NH <sub>4</sub> <sup>+</sup> -N | 73.8                  | 8.8             | 0.022           |
| Moisture                        | 6.1                   | 0.7             | 0.428           |
| pH                              | 7.4                   | 0.8             | 0.458           |
| AVN                             | 10.8                  | 1.3             | 0.334           |
| TN                              | 1.7                   | 0.2             | 0.732           |
| SOM                             | 0.2                   | <0.1            | 0.932           |

TN, total nitrogen; AVN, available nitrogen; NH<sub>4</sub><sup>+</sup>-N, ammonium nitrogen; SOM, soil organic matter.

**Table S3.** Illumina MiSeq sequenced denitrifying bacterial data based on the *nirK* gene.

| Samples | Raw_tags | Clean_tags | OTUs |
|---------|----------|------------|------|
| FP1     | 76194    | 73195      | 303  |
| FP2     | 58390    | 58023      | 319  |
| FP3     | 70913    | 68467      | 350  |
| DI1     | 51720    | 50686      | 256  |
| DI2     | 45973    | 45766      | 233  |
| DI3     | 51511    | 51328      | 213  |
| MF1     | 57208    | 56914      | 204  |
| MF2     | 53417    | 53057      | 206  |
| MF3     | 52109    | 51810      | 280  |

**Table S4.** Illumina MiSeq sequenced denitrifying bacterial data based on the *nirS* gene.

| <b>Samples</b> | <b>Raw_tags</b> | <b>Clean_tags</b> | <b>OTUs</b> |
|----------------|-----------------|-------------------|-------------|
| FP1            | 67948           | 55941             | 452         |
| FP2            | 60802           | 45238             | 410         |
| FP3            | 64484           | 55613             | 377         |
| DI1            | 72277           | 51613             | 469         |
| DI2            | 50091           | 41353             | 423         |
| DI3            | 54166           | 48758             | 385         |
| MF1            | 64399           | 51018             | 458         |
| MF2            | 63662           | 53699             | 550         |
| MF3            | 63855           | 58553             | 495         |

**Table S5.** The contribution rate in RDA of soil *nirK*-type denitrifiers community structure and soil nutrients under three irrigation systems.

| Name                            | Contribution% | pseudo-F | <i>P</i> |
|---------------------------------|---------------|----------|----------|
| Moisture                        | 46.2          | 6        | 0.022    |
| SOM                             | 15.7          | 2.5      | 0.05     |
| NH <sub>4</sub> <sup>+</sup> -N | 9.1           | 1.6      | 0.178    |
| AN                              | 6.4           | 1.1      | 0.334    |
| pH                              | 7.2           | 1.4      | 0.282    |
| ACHN                            | 6.7           | 1.5      | 0.286    |
| TN                              | 4.7           | 1.1      | 0.426    |
| NO <sub>3</sub> <sup>-</sup> -N | 4.1           | <0.1     | 1        |

SOM, soil organic matter; NH<sub>4</sub><sup>+</sup>-N, ammonium nitrogen; AN, ammonia nitrogen; ACHN, acid hydrolyzable organic nitrogen; TN, total nitrogen; NO<sub>3</sub><sup>-</sup>-N, nitrate nitrogen.

**Table S6.** The contribution rate in RDA of soil *nirS*-type denitrifiers community structure and soil nutrients under three irrigation systems.

| Name                            | Contribution % | pseudo-F | <i>P</i> |
|---------------------------------|----------------|----------|----------|
| NO <sub>3</sub> <sup>-</sup> -N | 28.2           | 4.3      | 0.004    |
| ACHN                            | 26.6           | 4.1      | 0.01     |
| Moisture                        | 11.5           | 1.5      | 0.194    |
| AN                              | 9              | 1.3      | 0.206    |
| SOM                             | 7.8            | 1.1      | 0.368    |
| TN                              | 5.9            | 0.9      | 0.518    |
| pH                              | 4.6            | 0.5      | 0.658    |
| NH <sub>4</sub> <sup>+</sup> -N | 6.4            | <0.1     | 1        |

NO<sub>3</sub><sup>-</sup>-N, nitrate nitrogen; ACHN, acid hydrolyzable organic nitrogen; AN, ammonia nitrogen; SOM, soil organic matter; TN, total nitrogen; NH<sub>4</sub><sup>+</sup>-N, ammonium nitrogen.

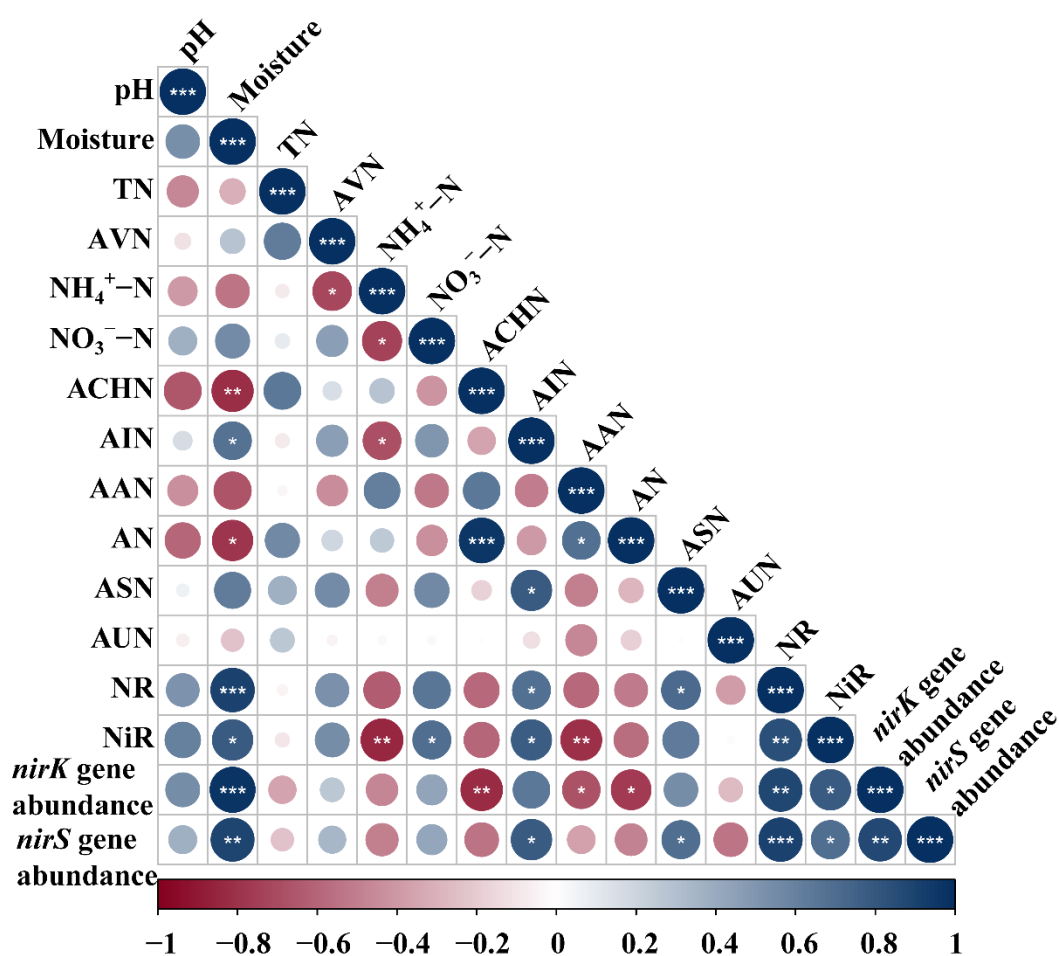

**Figure S1.** The correlation analysis among *nirK*- and *nirS*-type denitrifiers abundance, soil enzyme activities, and nutrients. TN, total nitrogen; AVN, available nitrogen;  $\text{NH}_4^+\text{-N}$ , ammonium nitrogen;  $\text{NO}_3^-\text{-N}$ , nitrate nitrogen; ACHN, acid hydrolyzable organic nitrogen; AIN, non-hydrolyzable nitrogen; AAN, amino acid nitrogen; AN, ammonia nitrogen; ASN, amino sugar nitrogen; AUN, unidentified hydrolyzable nitrogen; NR, nitrate reductase; NiR, nitrite reductase. \* indicates significance at  $P < 0.05$ , \*\* indicates significance at  $P < 0.01$ , \*\*\* indicates significance at  $P < 0.001$ .
